# Supplementary material for: Thermal activation process of Au/TiO2 system: a molecular spectroscopy study
Source: Royal Society of Chemistry journal article supplement (doi:10.1039/c6ra08136c), 2016-01-01
Supplement: c6ra08136c1.pdf [file c6ra08136c1.pdf]

**Electronic Supplementary information:**  
**Thermal activation process of Au/TiO<sub>2</sub> system: A molecular spectroscopy  
study**

S. R. Islas<sup>a</sup>, R. Zanella<sup>a</sup> and J. M. Saniger<sup>a,\*</sup>

*Centro de Ciencias Aplicadas y Desarrollo Tecnológico (CCADET), Universidad Autónoma de  
México, México D.F.; México A.P. 70-186*

\*To whom correspondence should be addressed: jose.saniger@ccadet.unam.mx

Phone: +52 56228602 ext. 1133

Contents

Supplementary Fig. 1S-2S

### TEM study of the TiO<sub>2</sub> supported Au nanoparticles.

The TiO<sub>2</sub> supported AuNPs growth as results of the thermal treatment were examined by High Resolution TEM with a Jeol-2010 FasTem analytical microscope equipped with a Z-contrast annular detector, operated at 200 keV. The average size and distribution of the AuNPs were determined by the measurement of 1,000 particles for each sample. The size limit for the detection of gold particles on TiO<sub>2</sub> was about 0.5 nm. The High Angle Annular Dark Field (HAADF) image of samples treated under H<sub>2</sub>/Ar at 300°C is illustrated in Figure S1a; this images show highly dispersed gold nanoparticles on the TiO<sub>2</sub> surface. The estimated average particle size of the AuNPs is 2.6 ±0.5 nm. The histogram shows that 60% of the nanoparticles have a size between 2 and 3 nm (Fig. 1Sb).

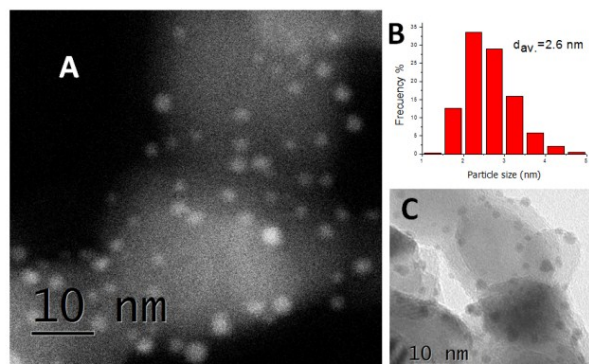

**Fig. 1S** Microscopic characterization (A) HAADF image, (B) Au NPs size distribution histogram, and (C) TEM image of the supported Au nanoparticles growth under H<sub>2</sub>/Ar atmosphere.

### Thermogravimetric analysis of supported and unsupported AuPrs.

The TGA curves of the unsupported AuPrs and TiO<sub>2</sub> supported AuPrs, displayed in the figure 2S, show that there is a difference of around 70°C between the onset of their corresponding thermal decomposition points. Knowing the equivalent chemical composition of both precursors, the lower thermal stability of the TiO<sub>2</sub> supported AuPrs is a clear indication of the active role played by the TiO<sub>2</sub> surface on the thermal decomposition mechanism and the existence of a strong precursor/support interaction.

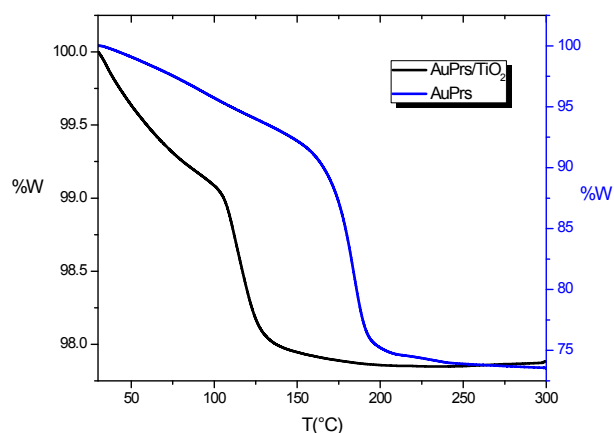

**Fig. 2S** Comparison between the thermal stability of supported and unsupported AuPrs thermally treated under H<sub>2</sub>/Ar atmosphere.
